# Supplementary material for: Optimization of tannin-derived hard carbon spheres for high-performance sodium-ion batteries
Source: Royal Society of Chemistry journal article supplement (doi:10.1039/d2ta07951h), 2023-01-01
Supplement: d2ta07951h1.pdf [file d2ta07951h1.pdf]

## Supporting Information

### Optimization of tannin-derived hard carbon spheres for high performance sodium-ion batteries

Adrian Beda,<sup>a,b,c</sup> François Rabuel,<sup>c,d</sup> Omar Rahmouni,<sup>a,b</sup> Mathieu Morcrette<sup>c,d</sup> and Camélia Matei Ghimbeu<sup>a,b,c,\*</sup>

<sup>a</sup> Université de Haute-Alsace. CNRS. Institut de Science des Matériaux de Mulhouse (IS2M) UMR 7361. F-68100 Mulhouse. France

<sup>b</sup> Université de Strasbourg. F-67081 Strasbourg. France

<sup>c</sup> Réseau sur le Stockage Electrochimique de l'Energie (RS2E). HUB de l'Energie. FR CNRS 3459. 80039 Amiens Cedex. France

<sup>d</sup> Université de Picardie Jules Verne. Laboratoire de Réactivité et Chimie des Solides (LRCS). UMR 7314 CNRS. HUB de l'Energie. 80039 Amiens. France

\* E-mail: [camelia.ghimbeu@uha.fr](mailto:camelia.ghimbeu@uha.fr)

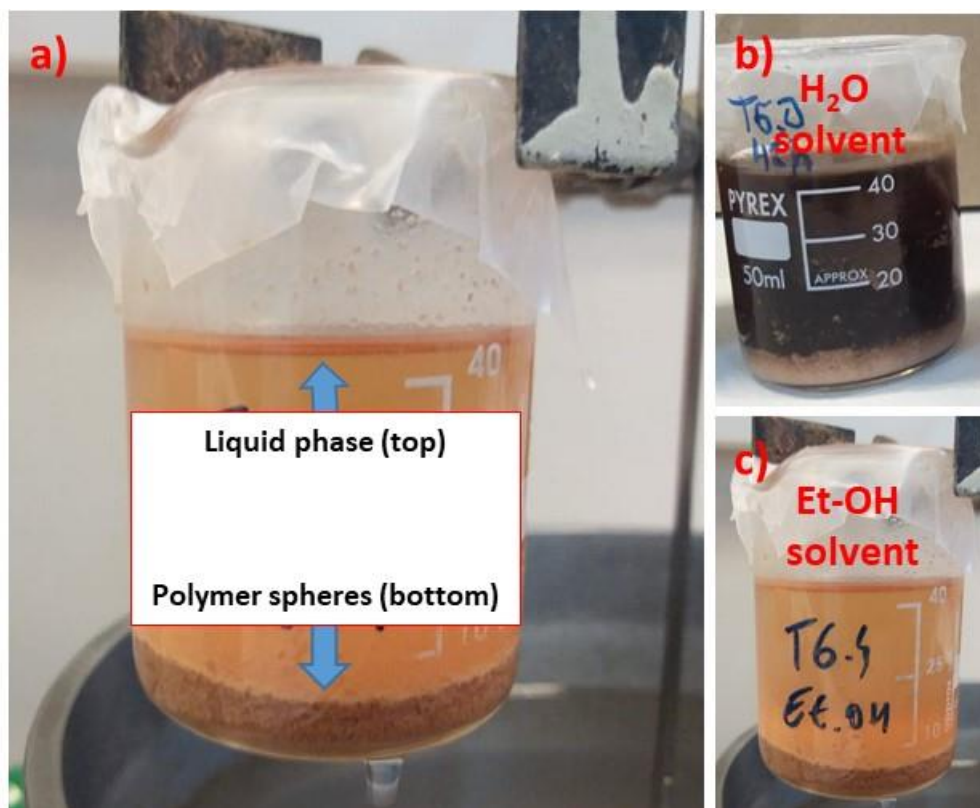

**Figure S1:** Polymer solutions after 48h reaction time: a) liquid phase on top to be discarded and the polymer spheres formed on the bottom side; b) solution obtained with H<sub>2</sub>O solvent and c) solution obtained with Et-OH solvent.

**Table S1.** Synthesis conditions used for optimization of polyphenol spheres. Only one parameter was varied at a time, and the name of the sample was given according to the parameter studied.

| Studied parameter | Polymer name           | Solvent type           | C-L* 1 type | C-L* 2 mass | C-L* 2 type | Synthesis time (h) |
|-------------------|------------------------|------------------------|-------------|-------------|-------------|--------------------|
| -                 | Reference <sup>#</sup> | H <sub>2</sub> O       | GA          | 0.5         | TEDA        | 48                 |
| Solvent           | Et-OH                  | Et-OH                  | GA          | 0.5         | TEDA        | 48                 |
|                   | H <sub>2</sub> O/Et-OH | H <sub>2</sub> O/Et-OH | GA          | 0.5         | TEDA        | 48                 |
| Cross-linker      | GL/TEDA                | H <sub>2</sub> O       | GL          | 0.5         | TEDA        | 48                 |
|                   | GA/TEDA                | H <sub>2</sub> O       | GA          | 0.5         | HMTA        | 48                 |
| Amount of C-L* 2  | 0.3 g TEDA             | H <sub>2</sub> O       | GA          | 0.3         | TEDA        | 48                 |
|                   | 0.4 g TEDA             | H <sub>2</sub> O       | GA          | 0.4         | TEDA        | 48                 |
| Synthesis time    | 24h                    | H <sub>2</sub> O       | GA          | 0.5         | TEDA        | 24                 |
|                   | 72h                    | H <sub>2</sub> O       | GA          | 0.5         | TEDA        | 72                 |

<sup>#</sup> - For comparison reasons, the name of the reference sample changes throughout the manuscript, in order to highlight the studied parameter; this sample is present in each set of studied parameters. \* - cross-linker

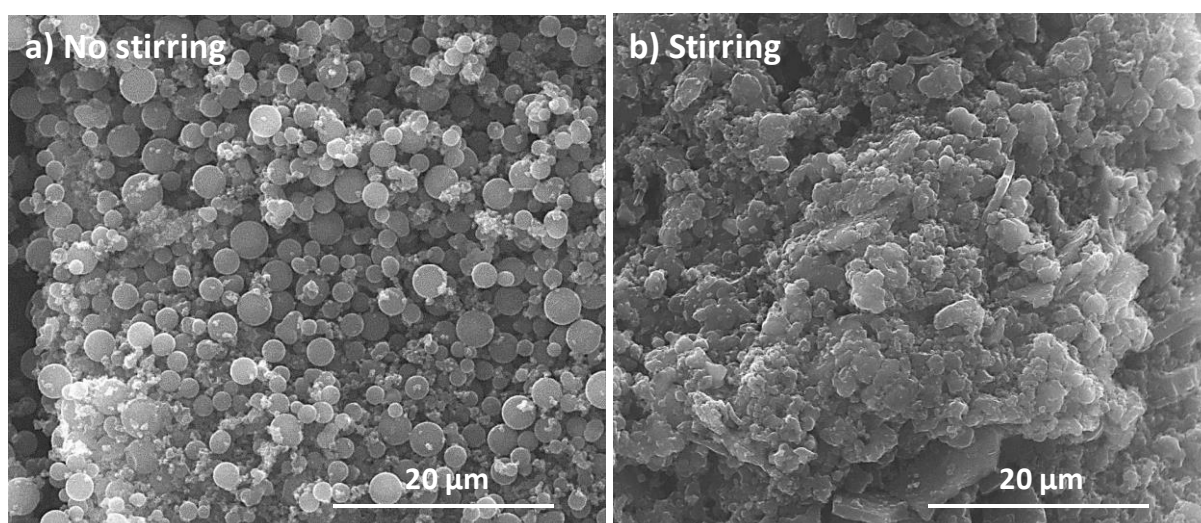

**Figure S2:** SEM images of carbon spheres obtained using Mimosa-MC precursor: (a) no stirring and (b) under stirring during the reaction.

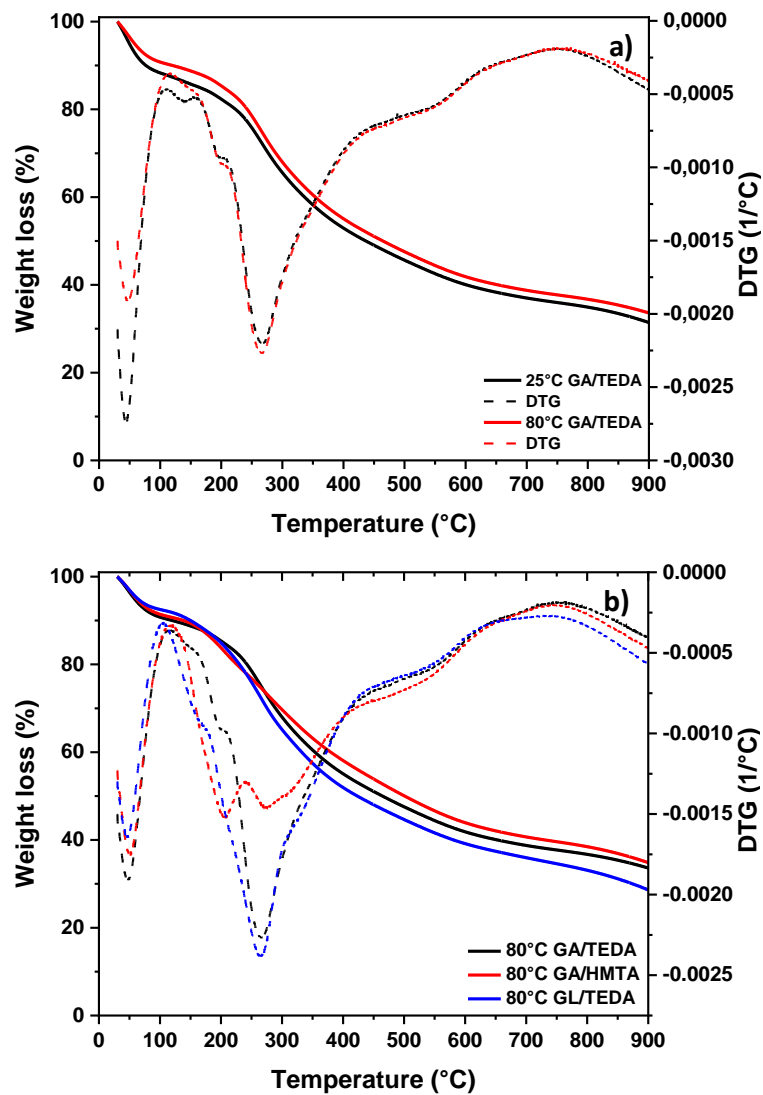

**Figure S3:** TGA/DTG profiles of the polymers obtained with Mimosa-MC precursor using water solvent and a) GA/TEDA cross-linkers at 25 °C and 80 °C; b) with different type of cross-linker (GA/TEDA, GA/HMTA, GL/TEDA) in the reaction mixture at 80 °C.

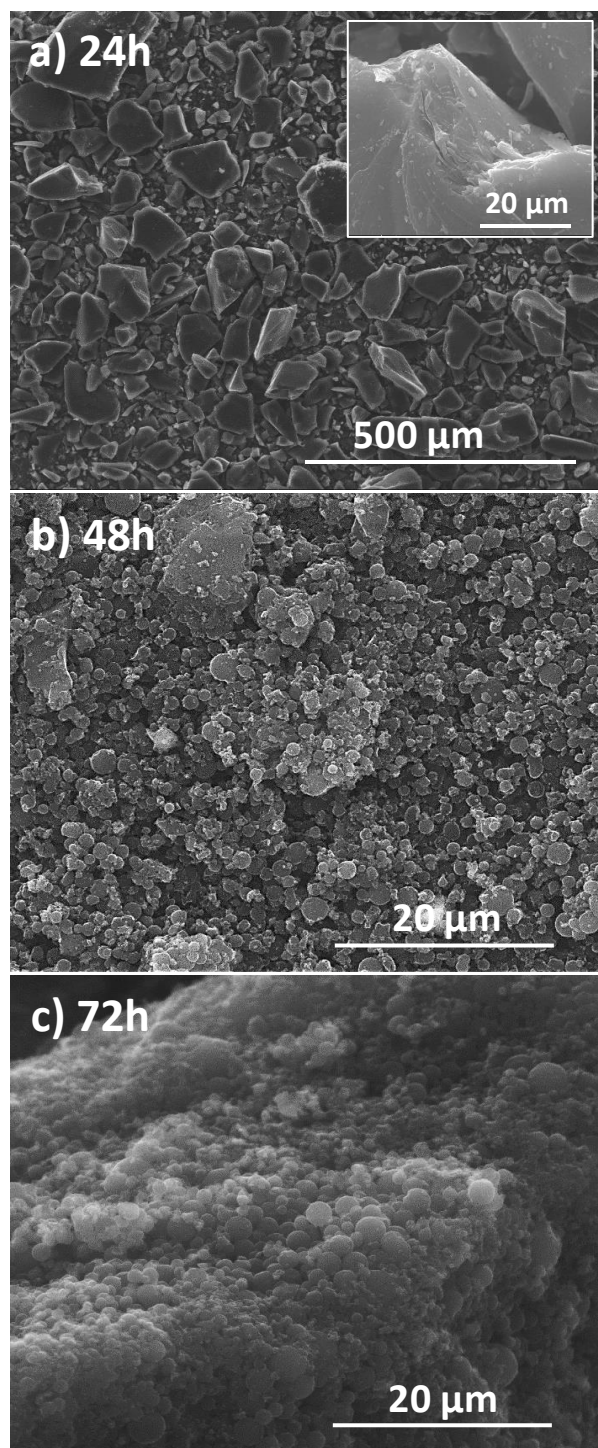

**Figure S4:** SEM images of carbon spheres obtained using Mimosa-MC precursor by varying the synthesis time: a) 24h ( ), b) 48h and c) 72h.

The elemental composition of polyphenol spheres and hard carbon materials was carried out with an Vario EL Cube CHNS Elemental Analyzer. The analyses were carried out under helium flow by burning the samples at 1100 °C. The released gases are further reduced (~850 °C), to CO<sub>2</sub>, SO<sub>2</sub>, H<sub>2</sub>O and NO<sub>x</sub> and then analysed by a thermal conductivity detector (TDC), by measuring the variation in the thermal conductivity of the gases to determine the CHNS composition. The oxygen amount was estimated by difference (100% - % CHNS), however, it should be mentioned that some inorganics are present in the materials (Table S2) and not taken into consideration.

**Table S2.** Chemical composition determined by elemental analysis on both polymer spheres and hard carbon materials along with the % of fixed carbon determined for the HCs.

| Material         | Elemental composition (wt%) |      |      |      |       | Fixed C |
|------------------|-----------------------------|------|------|------|-------|---------|
|                  | C                           | H    | N    | S    | O*    | %       |
| <b>Catechu</b>   | 49.68                       | 5.39 | 6.25 | 0.08 | 38.61 | -       |
| <b>Mimosa MC</b> | 51.93                       | 5.27 | 5.79 | 0.06 | 36.96 | -       |
| <b>Mimosa MG</b> | 51.28                       | 5.36 | 6.02 | 0.27 | 37.07 | -       |
| <b>HC-C1500</b>  | 97.20                       | 0.23 | 0.22 | 0.26 | 2.09  | 68.5    |
| <b>HC-MC1500</b> | 99.27                       | 0.12 | 0.24 | 0.24 | 0.13  | 70.7    |
| <b>HC-MG1500</b> | 98.26                       | 0.09 | 0.37 | 0.11 | 1.16  | 72.8    |
| <b>HC-MG1600</b> | 99.47                       | 0.09 | 0.21 | 0.13 | 0.10  | 73.9    |

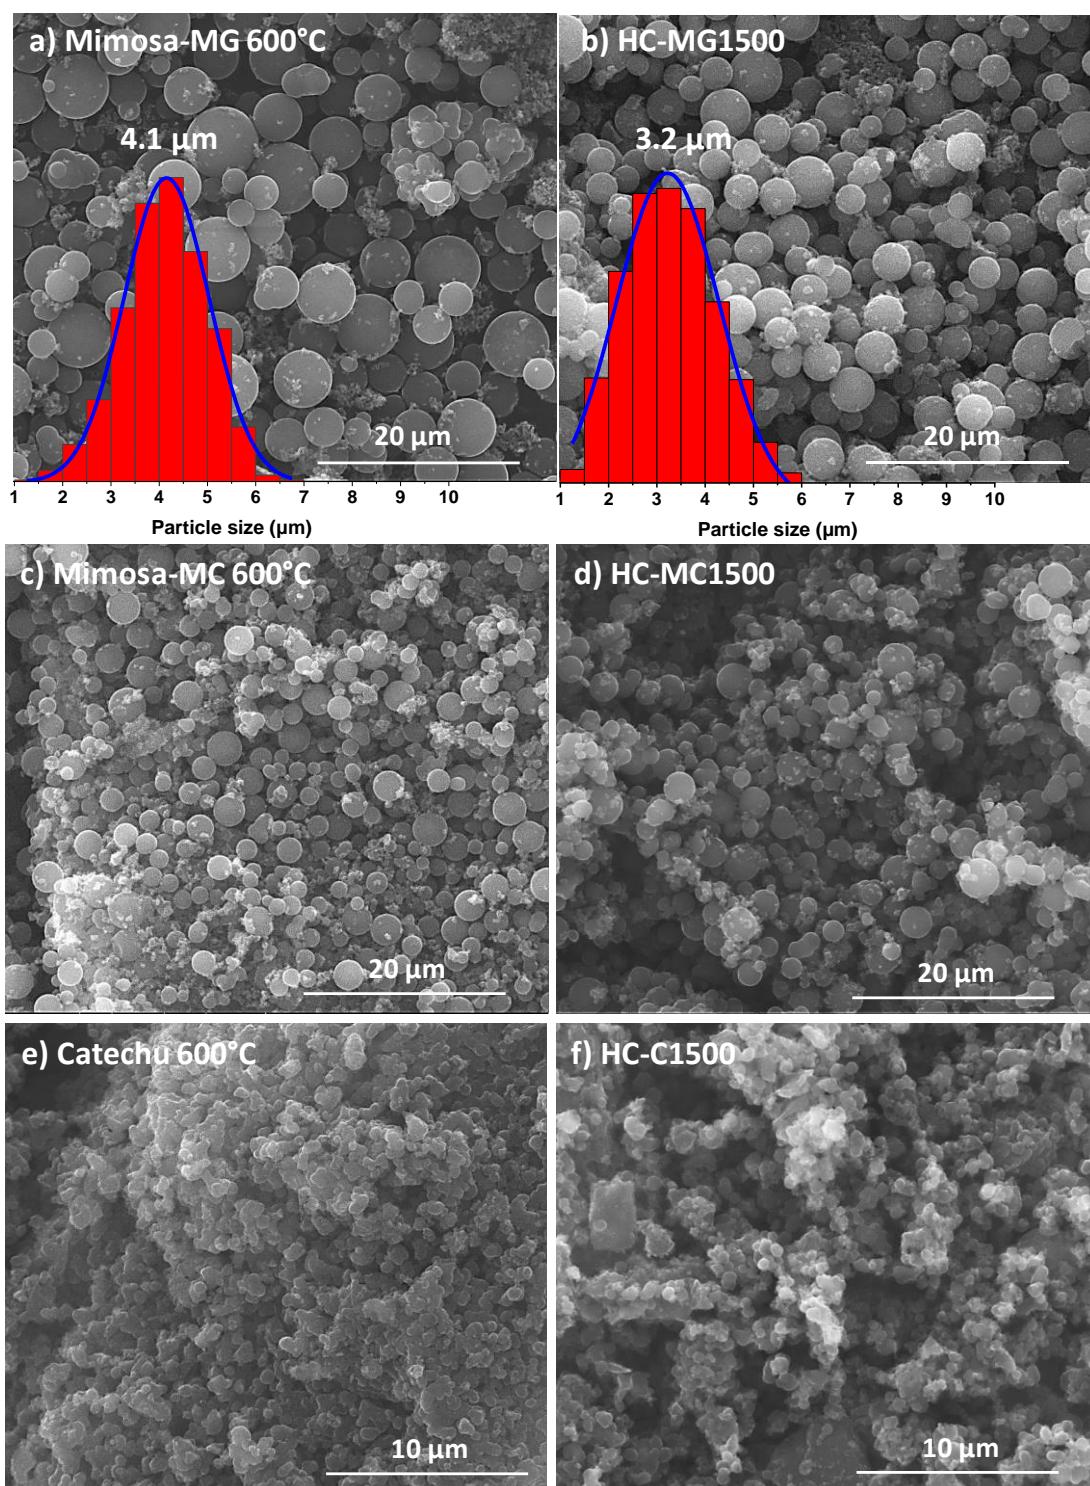

**Figure S5:** SEM images of carbon spheres obtained using Mimosa-MG precursor at different temperatures: a) 600 °C and b) 1500 °C. Inset: particles size distribution of the two materials. The micrographs of Mimosa-MC at c) 600 °C and d) 1500 °C and Cachou at e) 600 °C and f) 1500 °C.

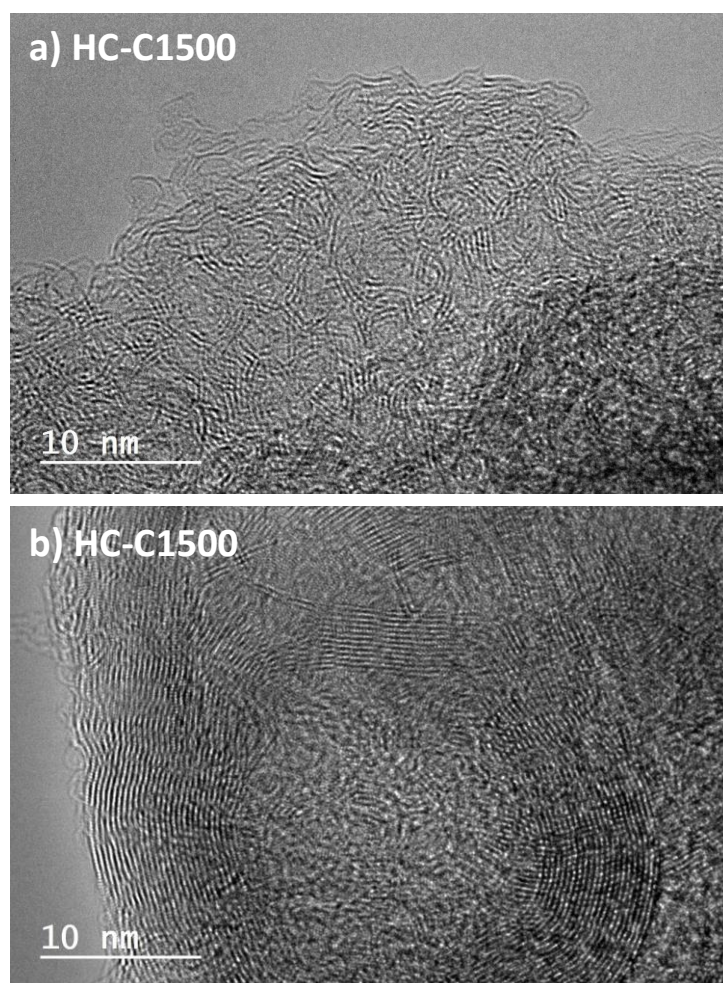

**Figure S6:** HR-TEM images of HC-C1500 material revealing the heterogeneous structure: a) disordered area and b) highly graphitized area.

**Table S3.** Pycnometric (He) densities, total pore volumes determined by N<sub>2</sub> adsorption (V<sub>OP</sub>), ratios of closed porosity (R<sub>CP</sub>) and open pores (R<sub>OP</sub>) and solid phase for hard carbon materials.

| HC        | d <sub>He</sub><br>(g cm <sup>-3</sup> ) | V <sub>OP</sub> N <sub>2</sub><br>(cm <sup>3</sup> g <sup>-1</sup> ) | R <sub>CP</sub><br>(%) | R <sub>OP</sub><br>(%) | Solid phase<br>(%) |
|-----------|------------------------------------------|----------------------------------------------------------------------|------------------------|------------------------|--------------------|
| HC-C1500  | 1.97                                     | 0.0141                                                               | 14.67                  | 2.70                   | 82.61              |
| HC-MC1500 | 2.10                                     | 0.0064                                                               | 09.35                  | 1.32                   | 89.31              |
| HC-MG1500 | 2.05                                     | 0.0069                                                               | 11.47                  | 1.39                   | 87.12              |
| HC-MG1600 | 1.88                                     | 0.0070                                                               | 18.71                  | 1.29                   | 79.98              |



**Table S4.** EDX chemical composition of the hard carbon materials

| Elements     | HC-C1500              | HC-MC1500 | HC-MG1500 | HC-MG1600 |
|--------------|-----------------------|-----------|-----------|-----------|
| C            | 91.91                 | 92.25     | 91.87     | 93.60     |
| O            | 6.97                  | 7.34      | 7.53      | 5.77      |
| Na           | -                     | -         | -         | -         |
| K            | 0.26                  | 0.31      | 0.26      | 0.23      |
| Ca           | 0.50                  | 0.10      | 0.19      | 0.25      |
| P            | 0.20                  | -         | 0.1       | 0.15      |
| Al           | -                     | -         | 0.05      | -         |
| Si           | 0.16                  | -         | -         | -         |
| <b>Total</b> | <b>100 (Weight %)</b> |           |           |           |

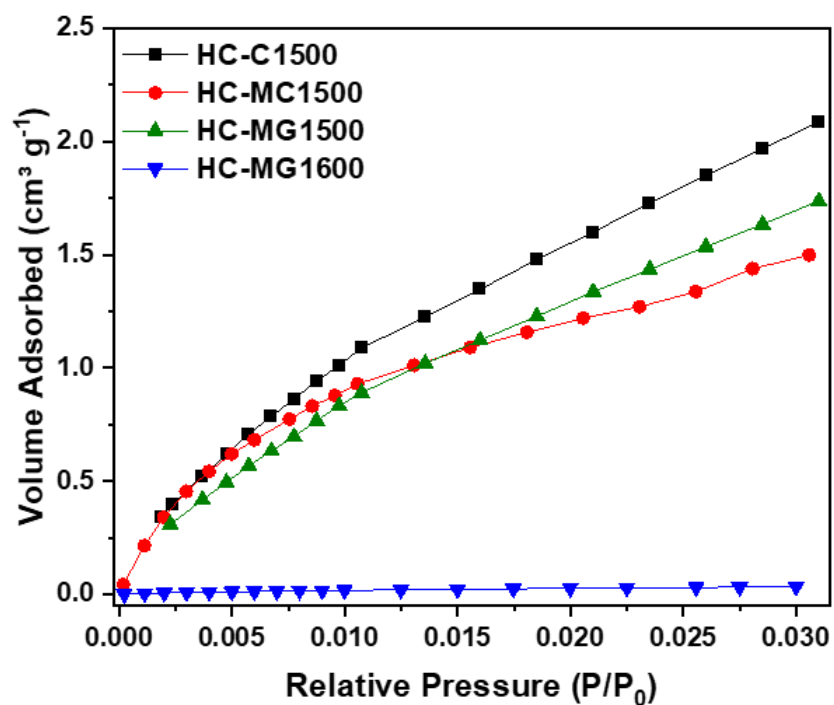

**Figure S7:** CO<sub>2</sub> adsorption isotherms at 273K of the HC materials.

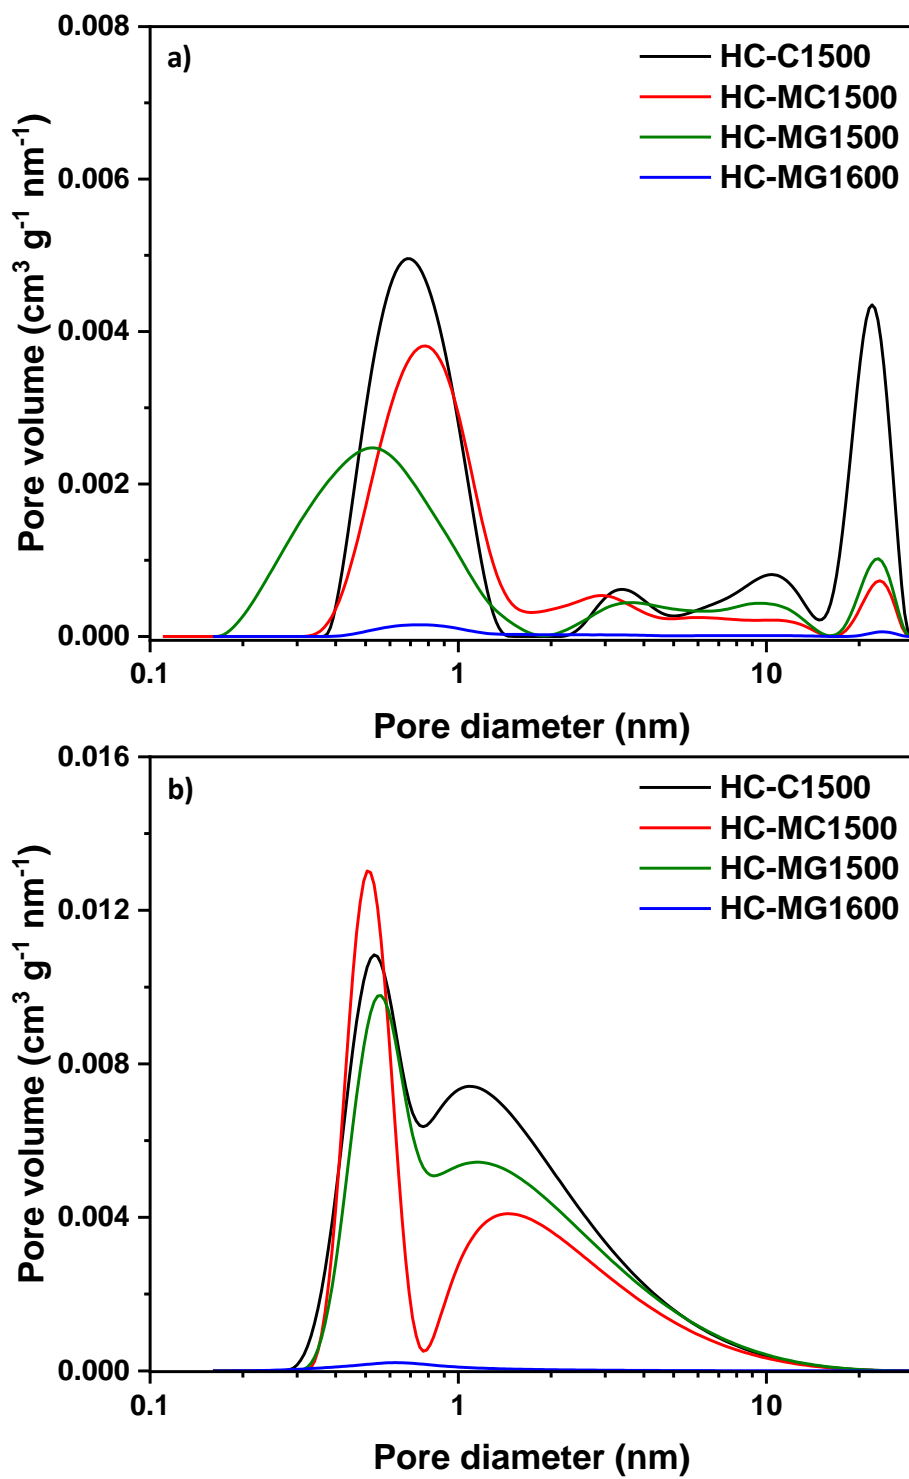

**Figure S8:**  $\text{N}_2$  and  $\text{CO}_2$  pore size distributions (log scale) determined by 2D-NLDFT theory

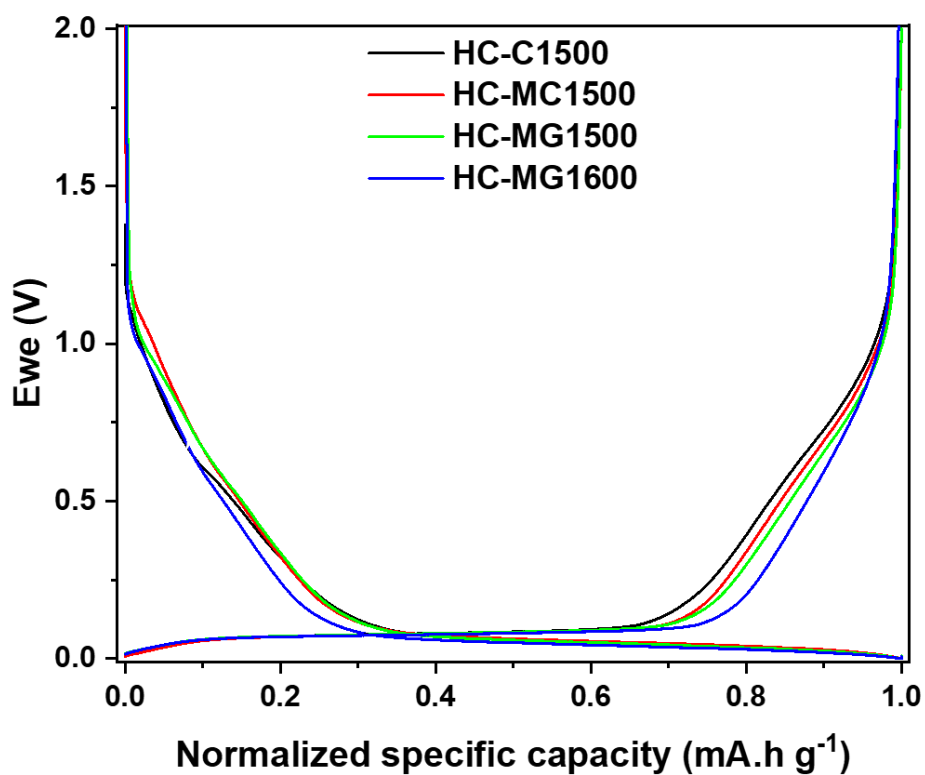

**Figure S9:** Normalized discharge-charge profiles of the HCS materials during the first charge/discharge cycle

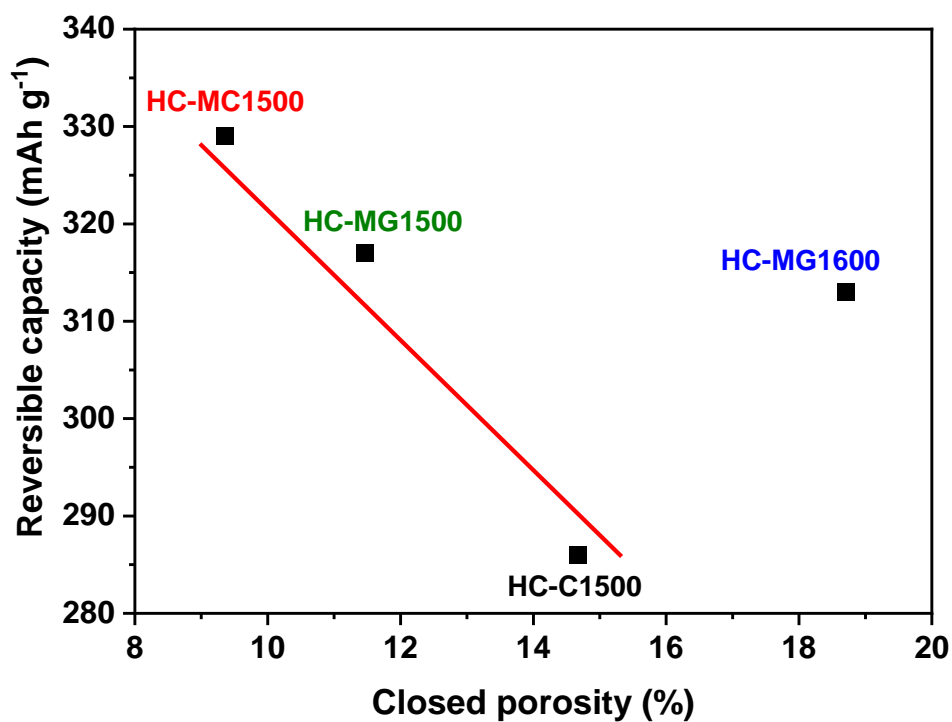

**Figure S10:** Correlation between reversible capacity of the HC materials and the closed porosity.

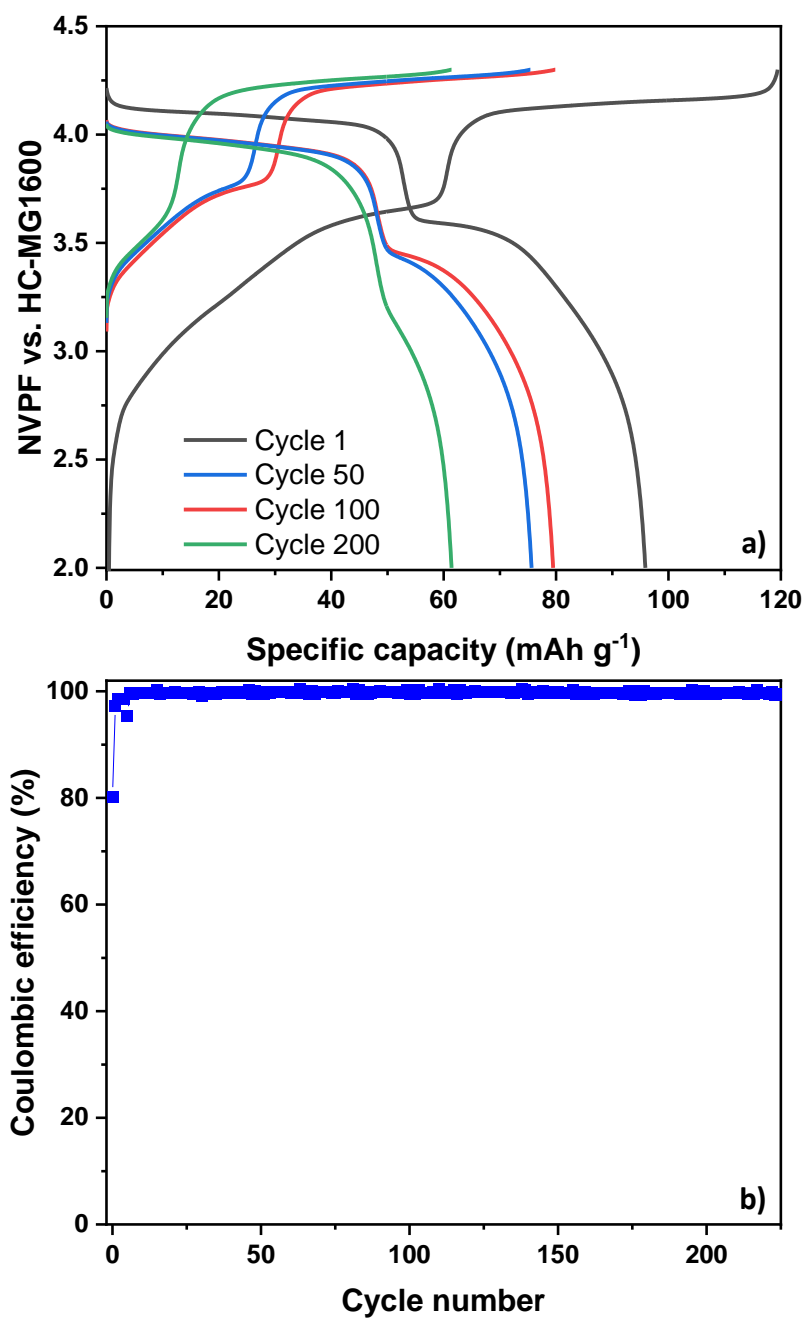

**Figure S11:** a) Full-cell retention of NVPF (vs. HC-MG1600) specific capacity at 1C after the 1<sup>st</sup>, 50<sup>th</sup>, 100<sup>th</sup> and 200<sup>th</sup> cycle. b) Coulombic efficiency evolution of the full-cell over cycling.

| Precursor                  | Remarks on the precursors/synthesis                   | Mass loading (mg cm <sup>-2</sup> ) | Electrode formulation AM:B:CC <sup>c</sup> | Electrolyte                     | Current density (mA g <sup>-1</sup> ) | ICE (%) | Rev. capacity (mAh g <sup>-1</sup> ) | Ref.          |
|----------------------------|-------------------------------------------------------|-------------------------------------|--------------------------------------------|---------------------------------|---------------------------------------|---------|--------------------------------------|---------------|
| Lotus stem                 | Used as food                                          | 1.0                                 | 90:10:00                                   | 1M NaClO <sub>4</sub> in EC:DEC | 40                                    | 70      | 350                                  | <sup>1</sup>  |
| Wine corks waste           | HCl treatment; Limited access                         | 2.5 - 3.5                           | 90: 5: 5                                   | 1M NaPF <sub>6</sub> in EC:DMC  | 30                                    | 81      | 358                                  | <sup>2</sup>  |
| Garlic                     | Expensive; Food                                       | ~ 1.0                               | 75:10:15                                   | 1M NaClO <sub>4</sub> in EC:DEC | 50                                    | 50.7    | 260                                  | <sup>3</sup>  |
| Camphor wood residues      | Pre-treatment at 300 °C; HCl washing after TT         | ~ 1.0                               | 80:10:10                                   | 1M NaClO <sub>4</sub> in EC:DMC | 20                                    | 83      | 324                                  | <sup>4</sup>  |
| Lotus leaves               | HTC <sup>b</sup> 1M HCl                               | 2.3                                 | 80:10:10                                   | 1M NaClO <sub>4</sub> in PC:DEC | 50                                    | 67      | 270                                  | <sup>5</sup>  |
| Sugarcane                  | NaOH/NaClO <sub>2</sub> washing                       | -                                   | 80:10:10                                   | 1M NaClO <sub>4</sub> in EC:PC  | 100                                   | 78.2    | 229                                  | <sup>6</sup>  |
| Sucrose                    | H <sub>2</sub> SO <sub>4</sub> dissolution            | ~ 1.0                               | 80:10:10                                   | 1M NaPF <sub>6</sub> in EC:PC   | 20                                    | 71.4    | 275                                  | <sup>7</sup>  |
| Milled-wood lignin         | Cheap; simple annealing                               | 1.1 - 1.3                           | 80:10:10                                   | 1M NaPF <sub>6</sub> in EC:DEC  | 20                                    | 80      | 293                                  | <sup>8</sup>  |
| Microcrystalline cellulose | Cheap; simple annealing                               | 1.1 - 1.3                           | 80:10:10                                   | 1M NaPF <sub>6</sub> in EC:DEC  | 20                                    | 87.3    | 343                                  | <sup>8</sup>  |
| Phloroglucinol             | Expensive                                             | 5.0 - 10.0                          | 94: 3: 3                                   | 1M NaPF <sub>6</sub> in EC:DMC  | 7.4                                   | 92      | 300                                  | <sup>9</sup>  |
| Phenolic resin             | Pre-treatment at 300 °C; Expensive/toxic <sup>a</sup> | 3.0 - 4.0                           | 90: 5: 5                                   | 1M NaPF <sub>6</sub> in EC:DEC  | 20                                    | 80.7    | 310                                  | <sup>10</sup> |
| Tannin extract             | Toxic Formaldehyde                                    | 3                                   | 92:2.6+2.5 <sup>d</sup> :2.9               | 1M NaPF <sub>6</sub> in EC:DMC  | 37.2                                  | 87      | 306                                  | <sup>11</sup> |
| HC-MC (tannin)             | Cheap; simple annealing                               | 3.0 - 5.0                           | 90: 5: 5                                   | 1M NaPF <sub>6</sub> in EC:DMC  | 37.2                                  | 85.4    | 295                                  | <sup>12</sup> |
| HC-MG (tannin)             | Cheap; simple annealing                               | 3.0 - 5.0                           | 90: 5: 5                                   | 1M NaPF <sub>6</sub> in EC:DMC  | 37.2                                  | 85.5    | 300                                  | <sup>12</sup> |
| HC-MC1500 (tannin)         | Sol-gel step                                          | 5.0 - 10.0                          | 94: 3: 3                                   | 1M NaPF <sub>6</sub> in EC:DMC  | 37.2                                  | 85      | 329                                  | <i>here</i>   |
| HC-MG1600 (tannin)         | Sol-gel step                                          | 5.0 - 10.0                          | 94: 3: 3                                   | 1M NaPF <sub>6</sub> in EC:DMC  | 37.2                                  | 88      | 313                                  | <i>here</i>   |

**Table S5.** Comparison between recently reported hard carbons in the literature and the best materials reported in this work. Different practical aspects were considered including the precursor origin and synthesis conditions, mass loading and electrode formulation, electrolyte, current density, and the electrochemical performance delivered, i.e., iCE and reversible capacity.

<sup>a</sup> not mentioned in the article the exact origin/synthesis procedure of the phenolic resin

<sup>b</sup> HTC – hydrothermal carbonization

<sup>c</sup> AM = active material; B = binder; CC = conductive carbon.

<sup>d</sup> 2.5% of Triton X-100 (surfactant)

## References

- 1 N. Zhang, Q. Liu, W. Chen, M. Wan, X. Li, L. Wang, L. Xue and W. Zhang, *Journal of Power Sources*, 2018, **378**, 331–337.
- 2 Y. Li, Y. Lu, Q. Meng, A. C. S. Jensen, Q. Zhang, Q. Zhang, Y. Tong, Y. Qi, L. Gu, M.-M. Titirici and Y.-S. Hu, *Advanced Energy Materials*, 2019, **9**, 1902852.
- 3 H. Liu, X. Liu, H. Wang, Y. Zheng, H. Zhang, J. Shi, W. Liu, M. Huang, J. Kan, X. Zhao and D. Li, *ACS Sustainable Chem. Eng.*, 2019, acssuschemeng.9b01370.
- 4 S. Guo, Y. Chen, L. Tong, Y. Cao, H. Jiao, Z. long and X. Qiu, *Electrochimica Acta*, 2022, **410**, 140017.
- 5 C.-C. Wang and W.-L. Su, *ACS Appl. Energy Mater.*, 2022, **5**, 1052–1064.
- 6 M. Kim, J. F. S. Fernando, Z. Li, A. Alowasheer, A. Ashok, R. Xin, D. Martin, A. Kumar Nanjundan, D. V. Golberg, Y. Yamauchi, N. Amiralian and J. Li, *Chemical Engineering Journal*, 2022, **445**, 136344.
- 7 Y. Huang, Y. Wang, P. Bai and Y. Xu, *ACS Appl. Mater. Interfaces*, 2021, **13**, 38441–38449.
- 8 X.-S. Wu, X.-L. Dong, B.-Y. Wang, J.-L. Xia and W.-C. Li, *Renewable Energy*, 2022, **189**, 630–638.
- 9 A. Beda, F. Rabuel, M. Morcrette, S. Knopf, P.-L. Taberna, P. Simon and C. M. Ghimbeu, *J. Mater. Chem. A*, 2021, **9**, 1743–1758.
- 10 Z. Wei, H.-X. Zhao, Y.-B. Niu, S.-Y. Zhang, Y.-B. Wu, H.-J. Yan, S. Xin, Y.-X. Yin and Y.-G. Guo, *Mater. Chem. Front.*, 2021, **5**, 3911–3917.
- 11 H. Tonnoir, D. Huo, R. L. S. Canevesi, V. Fierro, A. Celzard and R. Janot, *Materials Today Chemistry*, 2022, **23**, 100614.
- 12 A. Beda, A. M. Escamilla-Pérez, L. Simonin and C. Matei Ghimbeu, *ACS Appl. Energy Mater.*, 2022, **5**, 4774–4787.
